# Supplementary material for: Dual mode gelation behavior of silk fibroin microgel embedded poly(ethylene glycol) hydrogels
Source: Royal Society of Chemistry journal article supplement (doi:10.1039/c6tb00896h), 2016-01-01
Supplement: c6tb00896h1.pdf [file c6tb00896h1.pdf]

## Dual mode gelation behavior of silk fibroin microgel embedded poly(ethylene glycol) hydrogel

S. Ryu,<sup>a</sup> H. H. Kim,<sup>a</sup> Y. H. Park,<sup>a</sup> C.-C. Lin,<sup>b</sup> I. C. Um,<sup>c</sup> C. S. Ki<sup>a\*</sup>

<sup>a</sup>. Department of Biosystems and Biomaterials Science and Engineering, Seoul National University, Seoul 08826, Republic of Korea

<sup>b</sup>. Department of Biomedical Engineering, Purdue School of Engineering and Technology, Indiana University-Purdue University Indianapolis, Indianapolis, Indiana 46202, USA

<sup>c</sup>. Department of Bio-fibers and Materials Science, Kyungpook National University, Daegu 41566, Republic of Korea

*(Supplementary information)*

\* Corresponding author

Chang Seok Ki

Email: ki.cs@snu.ac.kr

Table S1. Formulation for SF-PEG hybrid hydrogel fabrication.

| Gel formulation              | 0% SF-4%<br>PEG | 1% SF-4%<br>PEG | 2% SF-4%<br>PEG | 3% SF-4%<br>PEG | 4% SF-4%<br>PEG | 4% SF-3%<br>PEG | 4% SF-5%<br>PEG |
|------------------------------|-----------------|-----------------|-----------------|-----------------|-----------------|-----------------|-----------------|
| PEG4NB (wt%)                 | 4.0             | 4.0             | 4.0             | 4.0             | 4.0             | 3.0             | 5.0             |
| [NB <sub>PEG4NB</sub> ] (mM) | 8.0             | 8.0             | 8.0             | 8.0             | 8.0             | 6.0             | 10.0            |
| SF-NB (wt%)                  | 0               | 1.0             | 2.0             | 3.0             | 4.0             | 4.0             | 4.0             |
| [NB <sub>SF-NB</sub> ] (mM)  | 0               | 0.8             | 1.6             | 2.5             | 3.3             | 3.3             | 3.3             |
| [SH] of DTT (mM)             | 10.0            | 10.0            | 10.0            | 10.0            | 10.0            | 8.0             | 12.0            |

The photoinitiator LAP of 1 mM was added into the precursor solution.

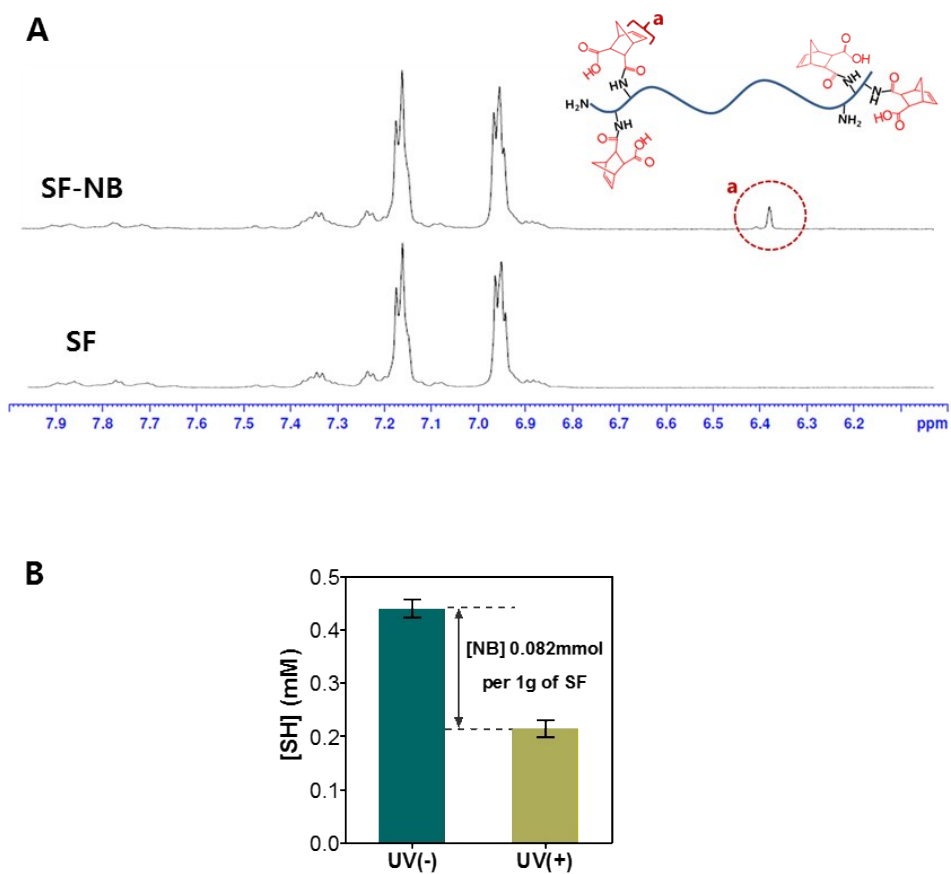

Fig. S1. (A) 600 MHz  $^1\text{H}$  NMR spectrum of norbornene-functionalized silk fibroin (SF-NB).  $\text{CF}_3\text{COOD}$  was used as a solvent. (B) Thiol group consumption by SF-NB under UV irradiation (5  $\text{mW}/\text{cm}^2$ , 365 nm, 5 min) with 1 mM LAP. Thiol group concentrations were measured by Ellman's assay ( $n = 3$ , mean  $\pm$  SD). The amount of immobilized norbornene groups on SF was calculated as 0.082 mmol/g.

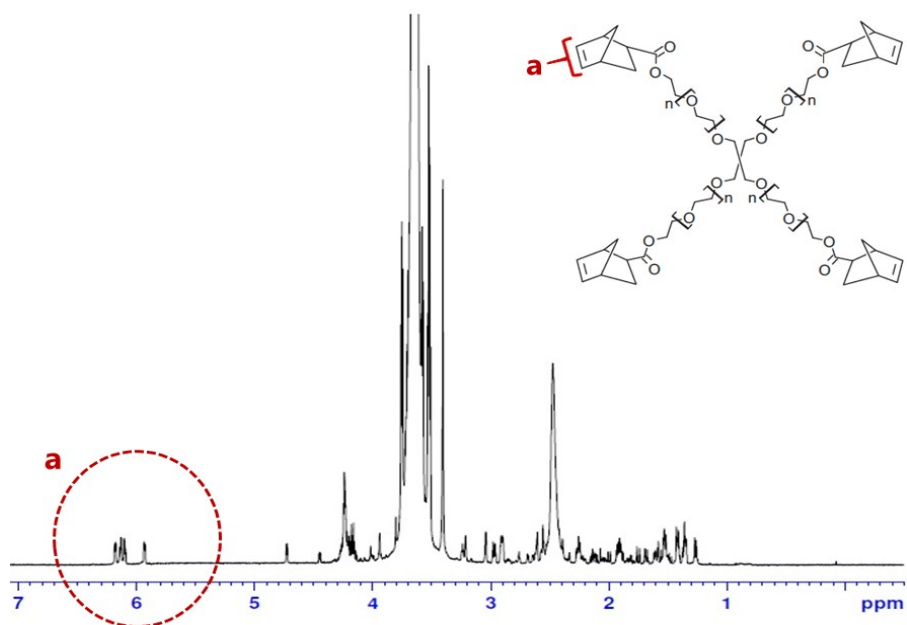

Fig. S2. 600 MHz <sup>1</sup>H NMR spectrum of norbornene-functionalized tetra-arm poly(ethylene glycol) (PEG4NB). CDCl<sub>3</sub> was used as a solvent.

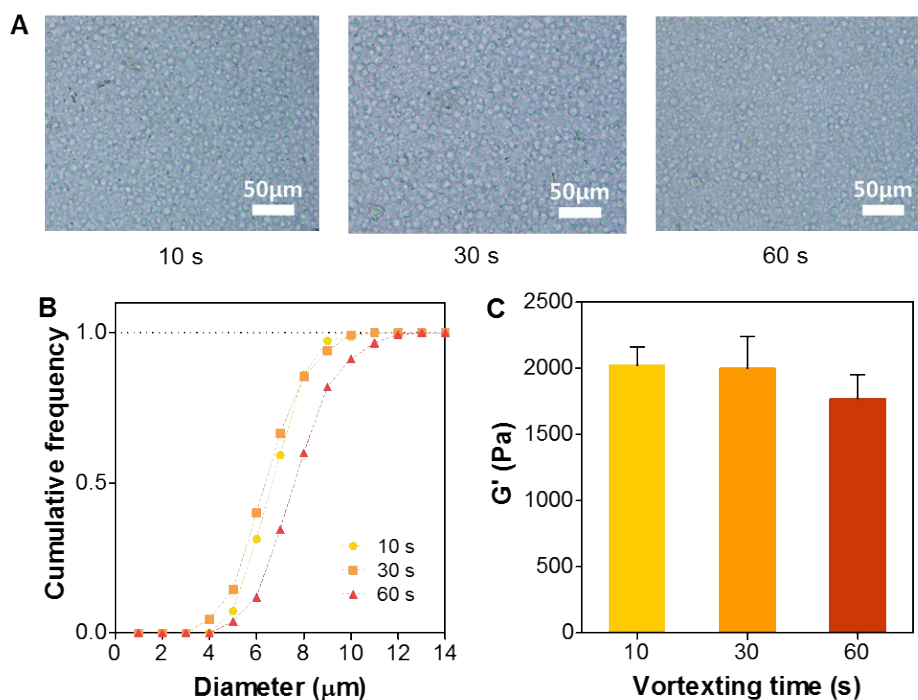

Fig. S3. (A) Phase-contrast images and (B) cumulative frequencies of diameters of SF-NB particles in PEG hydrogels fabricated with 4 wt% SF-NB and 4 wt% PEG4NB. The hydrogels were formed after vortexing of different times (10, 30, and 60 s) for precursor solution mixing. (C) Shear elastic moduli ( $G'$ ) of SF microgel embedded PEG hydrogels formed after different vortexing times at day-1 ( $n = 3$ , mean  $\pm$  SD).

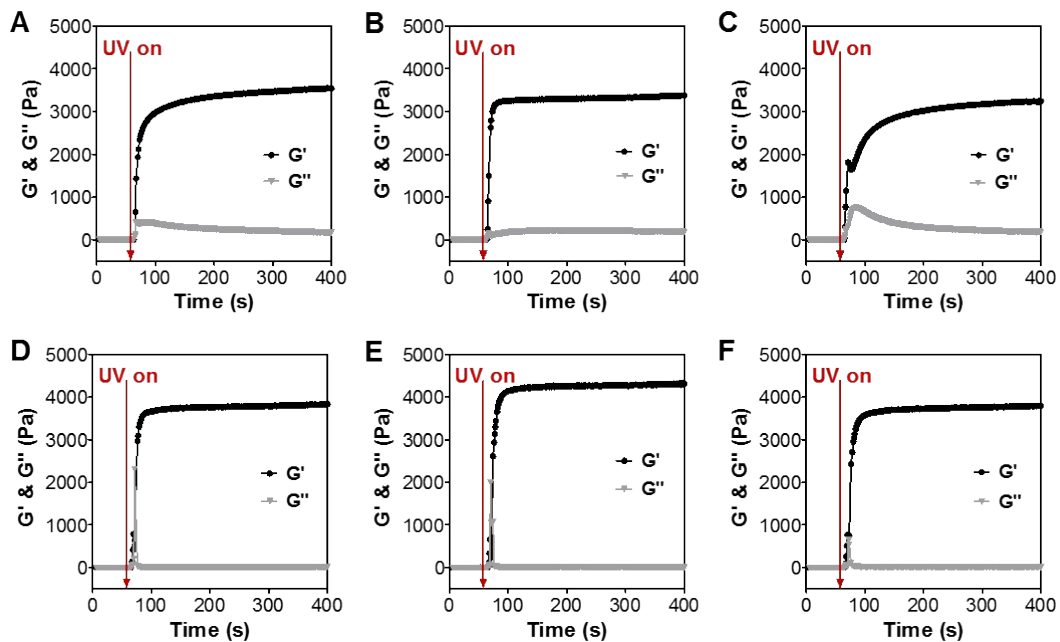

Fig. S4. In situ photo-rheometry results showing gelation kinetics of SF-PEG hybrid hydrogels formed with 1-3 wt% SF (A-C) and 1-3 wt% SF-NB (D-E) with 4 wt% PEG4NB in precursor solutions. UV light source was turned on at 60 seconds after the onset of measurement.

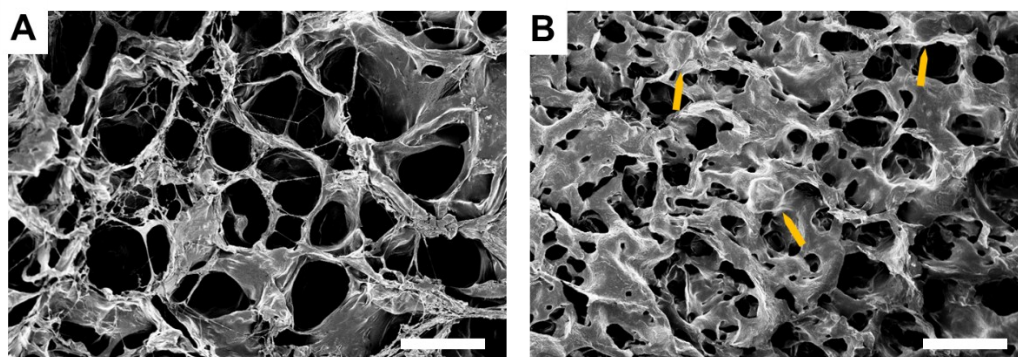

Fig. S5. Field-emission scanning electron microscopic images of (A) pure PEG hydrogel prepared from 4 wt% PEG4NB and (B) SF-PEG hybrid hydrogel (4 wt% SF-NB; 4 wt% PEG4NB) 5-day post-gelation. Yellow arrows indicate SF domain in SF-PEG hybrid hydrogel. (scale: 50  $\mu\text{m}$ )

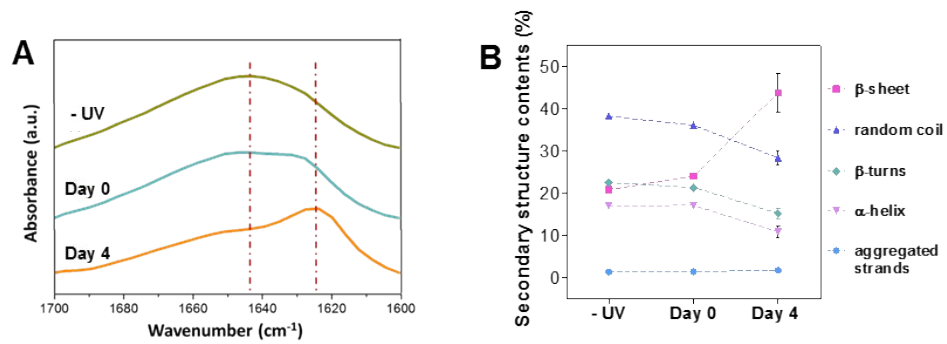

Fig. S6. (A) ATR-FTIR spectra of freeze-dried precursor solution (-UV), SF-PEG hybrid hydrogel right after the UV light irradiation (Day 0), and hydrogel after 4-day incubation in PBS (pH 7.4) at 37°C. All samples were prepared with 4 wt% SF-NB, 4 wt% PEG4NB, 5 mM DTT, and 1 mM LAP. (B) Changes of secondary structure composition of SF in hydrogel. Each fraction was obtained by integration of deconvoluted amide I band of IR spectrum ( $n = 3$ , mean  $\pm$  SD).



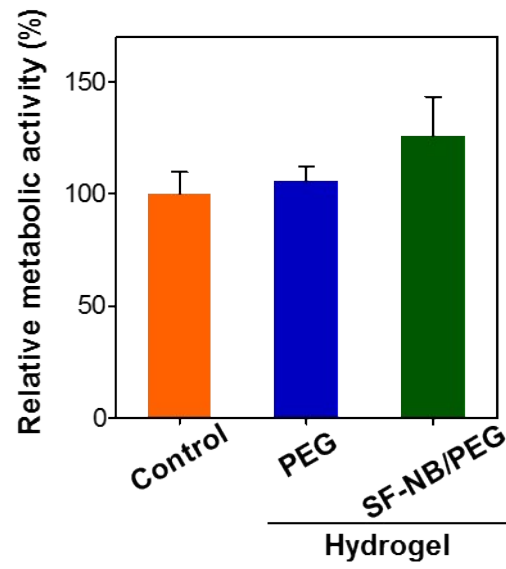

Fig. S7. Relative metabolic activities of NIH3T3 cells cultured with extracts of hydrogels. Metabolic activities were measured after cell incubation in extracts containing culture medium for 24 h by MTT assay. Control is the value obtained from non-treated cells (n = 5, mean  $\pm$  SD).

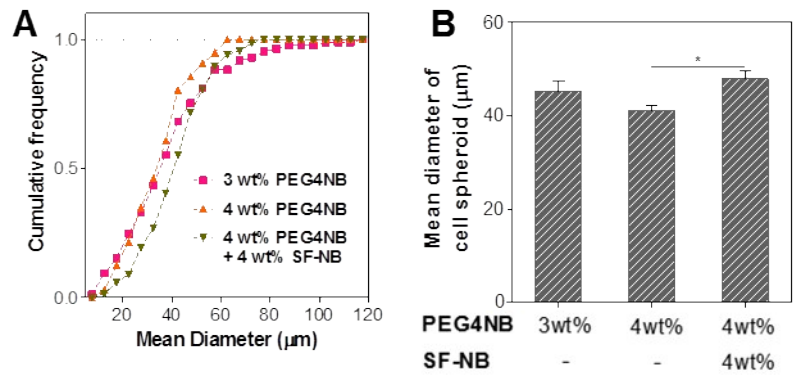

Fig. S8. (A) Cumulative frequencies of diameters and (B) mean diameters of A549 cell clusters in hydrogels 11-day post-encapsulation ( $n = 150$ , mean  $\pm$  SEM).
